# Supplementary material for: Prediction of Host-Specific Genes by Pan-Genome Analyses of the Korean Ralstonia solanacearum Species Complex
Source: Front Microbiol. 2019 Mar 15;10:506. doi: 10.3389/fmicb.2019.00506 (PMC6428702; doi:10.3389/fmicb.2019.00506)
Supplement: Supplementary file 3 [file Table_3.xlsx]

## Sheet: Table S3_Tomato
	Table S3. Characteristics of 128 genes present only in 4 tomato nonpathogenic strains and 8 genes present only in 21 tomato pathogenic strains.
	POG name	Other name	EggNog ID	Kegg ID	Product	Function	Note
	4 tomato nonpathogens
1	POG_2312_00006		S:ENOG410Y9EE		hypothetical protein
2	POG_2312_00007				hypothetical protein
3	POG_2312_00008				hypothetical protein
4	POG_2312_00009		S:ENOG410ZA79		hypothetical protein
5	POG_2312_00010				hypothetical protein
6	POG_2312_00011		U:COG3505	K03205	hypothetical protein
7	POG_2312_00013	hsdS	V:COG0732	K01154	Type I site-specific deoxyribonuclease		KEGG: hpaz:K756_11545 type I restriction enzyme, S subunit
8	POG_2312_00014		S:ENOG410Y2DX		Anticodon nuclease	Hydrolase; Nuclease.
9	POG_2312_00016		S:ENOG410YZZK		hypothetical protein
10	POG_2312_00018				hypothetical protein
11	POG_2312_00019		L:COG3293	K07492	hypothetical protein
12	POG_2312_00020		S:ENOG410YK2Z		hypothetical protein
13	POG_2312_00021		L:COG3293	K07492	hypothetical protein
14	POG_2312_00022		L:COG3293	K07492	hypothetical protein
15	POG_2312_00249		S:ENOG4111HFU		hypothetical protein
16	POG_2312_00555		S:ENOG41103VQ	K08732	Ral guanine nucleotide dissociation stimulator	Guanine-nucleotide releasing factor.	Stimulates the dissociation of GDP from the Ras-related RalA and RalB GTPases which allows GTP binding and activation of the GTPases. Interacts and acts as an effector molecule for R-Ras, H-Ras, K-Ras, and Rap. Contains 1 N-terminal Ras-GEF domain; Contains 1 Ras-associating domain; Contains 1 Ras-GEF domain.
17	POG_2312_00868		S:ENOG41128X2		hypothetical protein
18	POG_2312_00869		S:ENOG4112DDQ		hypothetical protein
19	POG_2312_00870				hypothetical protein
20	POG_2312_00871		L:ENOG4111N20	K04763	hypothetical protein
21	POG_2312_00872		S:ENOG4111G9I		hypothetical protein
22	POG_2312_00873		S:ENOG410Y7TT		hypothetical protein
23	POG_2312_00874		S:ENOG410YRYJ		hypothetical protein
24	POG_2312_00875				hypothetical protein
25	POG_2312_00879				hypothetical protein
26	POG_2312_00882		S:ENOG410YCI7		hypothetical protein
27	POG_2312_00883		O:COG2214	K05516	DnaJ like protein subfamily A member	Acetylation; Chaperone; Cytoplasm; Endoplasmic reticulum; Lipoprotein; Membrane; Metal-binding; Methylation; Microsome; Mitochondrion; Nucleus; Phosphoprotein; Prenylation; Repeat; Zinc; Zinc-finger.	Co-chaperone for HSPA8/Hsc70. Plays a role in protein transport into mitochondria via its role as co-chaperone. Functions as co-chaperone for HSPA1B and negatively regulates the translocation of BAX from the cytosol to mitochondria in response to cellular stress, thereby protecting cells against apoptosis. Stimulates ATP hydrolysis, but not the folding of unfolded proteins mediated by HSPA1A (in …
28	POG_2312_00884		S:ENOG410ZTSE		hypothetical protein
29	POG_2312_00885		S:COG4248		uncharacterized protein
30	POG_2312_00886		S:ENOG4111YVJ		uncharacterized protein
31	POG_2312_00887		S:COG4245		uncharacterized protein		Contains 1 VWFA domain.
32	POG_2312_00888	DPO3E,dnaQ	S:ENOG4111RWV	K02342	DNA-directed DNA polymerase		KEGG: mcx:BN42_41119 DNA polymerase III subunit epsilon
33	POG_2312_00889				hypothetical protein
34	POG_2312_00894				hypothetical protein
35	POG_2312_00895				hypothetical protein
36	POG_2312_00896		K:COG1396		hypothetical protein
37	POG_2312_00897				hypothetical protein
38	POG_2312_00898	RTCB,rtcB	S:COG1690	K14415	RNA ligase (ATP)	DNA damage; DNA repair; Ligase; Manganese; Metal-binding.	RNA ligase that mediates the joining of broken tRNA-like stem-loop structures in case of tRNA damage. Probably participates to tRNA restriction-repair by ligating broken tRNA-like stem-loop structures with 2',3'-cyclic phosphate and 5'-OH ends to form a splice junction with a 2'-OH, 3',5'-phosphodiester, a step that requires GTP (PubMed:21224389, PubMed:22730297). Also acts as a DNA ligase in cas…
39	POG_2312_01205		S:ENOG410Y502		hypothetical protein
40	POG_2312_01266		K:ENOG4112BE8		hypothetical protein
41	POG_2312_01267		S:ENOG4111UPI		hypothetical protein
42	POG_2312_01377				hypothetical protein
43	POG_2312_01378				hypothetical protein
44	POG_2312_01785				hypothetical protein
45	POG_2312_01786		S:COG2916	K03746	hypothetical protein	histone family protein nucleoid-structuring protein h-ns; DNA-binding protein H-NS; DNA Metabolism / null / Nucleoid-associated_proteins_in_Bacteria / DNA-binding protein H-NS
46	POG_2312_01792				hypothetical protein
47	POG_2312_01793				hypothetical protein
48	POG_2312_01794				hypothetical protein
49	POG_2312_01797		S:ENOG410XYF1		hypothetical protein
50	POG_2312_01798				hypothetical protein
51	POG_2312_02168	csn1,cas9	L:COG3513	K09952	CRISPR-associated endonuclease Cas9	Antiviral defense; DNA-binding; Endonuclease; Hydrolase; Magnesium; Metal-binding; Nuclease; RNA-binding.	CRISPR (clustered regularly interspaced short palindromic repeat) is an adaptive immune system that provides protection against mobile genetic elements (viruses, transposable elements and conjugative plasmids). CRISPR clusters contain spacers, sequences complementary to antecedent mobile elements, and target invading nucleic acids. CRISPR clusters are transcribed and processed into CRISPR RNA (cr…
52	POG_2312_02169		L:COG1518	K15342	CRISPR-associated endonuclease Cas1	Antiviral defense; DNA-binding; Endonuclease; Hydrolase; Magnesium; Manganese; Metal-binding; Nuclease.	CRISPR (clustered regularly interspaced short palindromic repeat), is an adaptive immune system that provides protection against mobile genetic elements (viruses, transposable elements and conjugative plasmids). CRISPR clusters contain spacers, sequences complementary to antecedent mobile elements, and target invading nucleic acids. CRISPR clusters are transcribed and processed into CRISPR RNA (c…
53	POG_2312_02170		L:COG3512	K09951	CRISPR-associated endoribonuclease Cas2	Antiviral defense; Endonuclease; Hydrolase; Magnesium; Metal-binding; Nuclease.	CRISPR (clustered regularly interspaced short palindromic repeat), is an adaptive immune system that provides protection against mobile genetic elements (viruses, transposable elements and conjugative plasmids). CRISPR clusters contain sequences complementary to antecedent mobile elements and target invading nucleic acids. CRISPR clusters are transcribed and processed into CRISPR RNA (crRNA). Fun…
54	POG_2312_02171				hypothetical protein
55	POG_2312_02208				hypothetical protein
56	POG_2312_02209				hypothetical protein
57	POG_2312_02210				hypothetical protein
58	POG_2312_02211		S:ENOG410ZXI2		Glycine-rich cell wall structural protein	Cell wall; Cell wall biogenesis/degradation; Repeat; Secreted; Signal.	Responsible for plasticity of the cell wall.
59	POG_2312_02416		S:ENOG4111MFE		hypothetical protein
60	POG_2312_02445				hypothetical protein
61	POG_2312_02447				hypothetical protein
62	POG_2312_02549		S:ENOG41121N0	K15125	Epstein-Barr nuclear antigen	Activator; DNA-binding; Host nucleus; Host-virus interaction; Inhibition of host adaptive immune response by virus; Inhibition of host NF-kappa-B by virus; Inhibition of host proteasome antigen processing by virus; Transcription; Transcription regulation; Viral immunoevasion.	Plays an essential role in replication and partitioning of viral genomic DNA during latent viral infection. During this phase, the circular double-stranded viral DNA undergoes replication once per cell cycle and is efficiently partitioned to the daughter cells. EBNA1 activates the initiation of viral DNA replication through binding to specific sites in the viral latent origin of replication, oriP…
63	POG_2312_02550				hypothetical protein
64	POG_2312_02754		S:ENOG410ZQPZ		hypothetical protein
65	POG_2312_02755		S:ENOG410XXXN		hypothetical protein
66	POG_2312_02758				hypothetical protein
67	POG_2312_03252				hypothetical protein
68	POG_2312_03449				hypothetical protein
69	POG_2312_03489		S:COG3501	K11904	hypothetical protein
70	POG_2312_03573				hypothetical protein
71	POG_2312_03649				hypothetical protein
72	POG_2312_03650				hypothetical protein
73	POG_2312_03732		K:COG1396		hypothetical protein
74	POG_2312_03733		K:COG2932		hypothetical protein
75	POG_2312_03734				hypothetical protein
76	POG_2312_03735		L:COG2801	K07497	hypothetical protein
77	POG_2312_03736		L:ENOG4111GUQ		hypothetical protein
78	POG_2312_03737				hypothetical protein
79	POG_2312_03738		S:ENOG41120IM		hypothetical protein
80	POG_2312_03739		S:ENOG410XUH0		hypothetical protein
81	POG_2312_03740				hypothetical protein
82	POG_2312_03741				hypothetical protein
83	POG_2312_03742				hypothetical protein
84	POG_2312_03743		S:ENOG4111UM7		hypothetical protein
85	POG_2312_03744				hypothetical protein
86	POG_2312_03745		S:ENOG4111NEI		hypothetical protein
87	POG_2312_03746				hypothetical protein
88	POG_2312_03747				hypothetical protein
89	POG_2312_03748		S:ENOG4111YCS		hypothetical protein
90	POG_2312_03750		S:ENOG410XWSJ	K07132	hypothetical protein
91	POG_2312_03751		S:ENOG4111U4Z		hypothetical protein
92	POG_2312_03752		S:ENOG410Z6ZM		hypothetical protein
93	POG_2312_03753		S:ENOG410ZUH5		hypothetical protein
94	POG_2312_03754		T:COG1734		hypothetical protein
95	POG_2312_03755				hypothetical protein
96	POG_2312_03756		S:ENOG4111RKF		hypothetical protein
97	POG_2312_03757		S:ENOG410XNW6		hypothetical protein
98	POG_2312_03758		S:COG4383		Portal protein	Capsid protein; Host cytoplasm; Late protein; Viral capsid assembly; Viral contractile tail ejection system; Viral genome ejection through host cell envelope; Viral genome packaging; Viral penetration into host cytoplasm; Virion; Virus entry into host cell; Virus exit from host cell.	Forms the portal vertex of the capsid. This portal plays critical roles in head assembly, genome packaging, neck/tail attachment, and genome ejection. The portal protein multimerizes as a single ring-shaped homododecamer arranged around a central channel. Binds to the terminase subunits to form the packaging machine. Acts as a linker between the capsid and tail. Required for attachment of the nec…
99	POG_2312_03759		S:COG2369		Putative capsid assembly protein	Host cytoplasm; Late protein; Viral capsid assembly; Virion; Virus exit from host cell.	Involved in capsid assembly.
100	POG_2312_03760		S:COG5005		hypothetical protein
101	POG_2312_03762		S:ENOG41126PV		hypothetical protein
102	POG_2312_03763		S:COG4397		Mu-like prophage FluMu major head subunit		To phage Mu protein T.
103	POG_2312_03764				hypothetical protein
104	POG_2312_03765		S:COG4387		Mu-like prophage FluMu protein gp36		To phage Mu protein gp36.
105	POG_2312_03766				hypothetical protein
106	POG_2312_03767				hypothetical protein
107	POG_2312_03769		S:ENOG410ZDIZ		hypothetical protein
108	POG_2312_03770		S:ENOG410XYVK	K03646	Probable tape measure protein	Coiled coil; Viral tail assembly; Virus exit from host cell.	Serves as a base for tail tube protein polymerization and acts as a template for tail length determination; Belongs to the Mulikevirus tape measure protein family.
109	POG_2312_03775		S:ENOG410XXU2		hypothetical protein
110	POG_2312_03877				hypothetical protein
111	POG_2312_04004		T:COG0639	K01090	Protein-serine/threonine phosphatase		KEGG: btm:MC28_2247 protein phosphatase
112	POG_2312_04005				hypothetical protein
113	POG_2312_04006				hypothetical protein
114	POG_2312_04092				hypothetical protein
115	POG_2312_04133				hypothetical protein
116	POG_2312_04220		U:COG3210	K15125	hypothetical protein
117	POG_2312_04221		U:COG3210	K15125	hypothetical protein
118	POG_2312_04247		L:COG2801	K07497	hypothetical protein
119	POG_2312_04248		L:COG2801	K07497	Insertion element IS476 uncharacterized 39.2 kDa protein	Transposable element.	Contains 1 integrase catalytic domain.
120	POG_2312_04249		L:COG2801	K07497	Insertion element IS476 uncharacterized 39.2 kDa protein	Transposable element.	Contains 1 integrase catalytic domain.
121	POG_2312_04250		L:COG2801	K07497	hypothetical protein
122	POG_2312_04251		T:COG2204	K10126	Alginate biosynthesis transcriptional regulatory protein AlgB	Activator; Alginate biosynthesis; ATP-binding; DNA-binding; Nucleotide-binding; Phosphoprotein; Transcription; Transcription regulation; Two-component regulatory system.	Member of the two-component regulatory system AlgB/KinB involved in regulation of alginate biosynthesis genes. Positive regulator of the alginate biosynthetic gene AlgD. Contains 1 response regulatory domain; Contains 1 sigma-54 factor interaction domain.
123	POG_2312_04252		S:ENOG410XPGJ		hypothetical protein
124	POG_2312_04252				hypothetical protein
125	POG_2312_04261		S:ENOG411292U		hypothetical protein
126	POG_2312_04263				hypothetical protein
127	POG_2312_04467		L:COG3293	K07492	hypothetical protein
128	POG_2312_04613				hypothetical protein
	21 tomato pathogens
1	POG_2064_00116		U:COG2165	K02456	Type II secretion system protein	Methylation; Protein transport; Transport.	Involved in a type II secretion system (T2SS, formerly general secretion pathway, GSP) for the export of proteins. Required for the translocation of the multiple pectic enzymes. Belongs to the GSP G family.
2	POG_2064_00118		U:ENOG410ZZ6R	K02456	Fimbrial protein	Cell adhesion; Disulfide bond; Fimbrium; Glycoprotein; Methylation; Phosphoprotein.	This protein is the predominant Neisseria surface antigen, which allows adhesion of the bacterium to various host cells. Belongs to the N-Me-Phe pilin family.
3	POG_2064_00122		U:COG4796	K02453	Type IV pilus bioproteinis and competence protein PilQ	Cell outer membrane; Competence; Membrane; Protein transport; Signal; Transport.	Required for type IV pilus biogenesis and competence. Could function as a pore for exit of the pilus but also as a channel for entry of heme and antimicrobial agents and uptake of transforming DNA; Belongs to the GSP D family.
4	POG_2064_00123		M:COG3209		Probable deoxyribonuclease RhsB	Hydrolase; Membrane; Nuclease; Repeat; Toxin; Transmembrane; Transmembrane helix.	Toxic component of a toxin-immunity protein module, which functions as a cellular contact-dependent growth inhibition (CDI) system. This protein may be a nuclease that is specifically inhibited by its cognate immunity protein RhsBI. Upon expression of the C-terminus (residues 1284-1436) in E.coli growth is inhibited, cells elongate, nucleoids condense and plasmid DNA is degrade; these effects are…
5	POG_2064_02102		S:COG1376		hypothetical protein
6	POG_2064_04196	pcaL	S:ENOG410XRF3	K14727	3-oxoadipate enol-lactonase		KEGG: azc:AZC_1444 3-oxoadipate enol-lactonase / 4-carboxymuconolactone decarboxylase
7	POG_2064_04377		S:ENOG410YAST		hypothetical protein
8	POG_2064_04625		S:ENOG410ZHXP		hypothetical protein
