# Supplementary material for: Prediction of Host-Specific Genes by Pan-Genome Analyses of the Korean Ralstonia solanacearum Species Complex
Source: Front Microbiol. 2019 Mar 15;10:506. doi: 10.3389/fmicb.2019.00506 (PMC6428702; doi:10.3389/fmicb.2019.00506)
Supplement: Supplementary file 5 [file Table_5.xlsx]

## Sheet: Table S5_Pepper
	Table S5. Characteristics of 34 genes present only in 13 pepper pathogenic strains and 1 gene present only in 12 pepper nonpathogenic strains.
	POG name	Other name	EggNog ID	Kegg ID	Product	Function	Note
	12 pepper nonpathogens
1	POG_2064_00408		M:COG3209	K11904	hypothetical protein	YD repeat protein; type VI secretion system secreted protein VgrG; Membrane Transport / Protein secretion system, Type VI / Type_VI_secretion_systems / VgrG protein
	13 pepper pathogens
1	POG_2330_00090		S:COG1073	K06889	uncharacterized protein	Hydrolase; uncharacterized protein
2	POG_2330_00602				hypothetical protein
3	POG_2330_01806		I:COG2267		hypothetical protein	alpha beta hydrolase fold; Fatty Acids, Lipids, and Isoprenoids / Triacylglycerols / Triacylglycerol_metabolism / Lysophospholipase (EC 3.1.1.5)
4	POG_2330_01807		K:COG1522	K03719	Bkd operon transcriptional regulator	Activator; DNA-binding; Transcription; Transcription regulation.; transcriptional regulator AsnC family; Lrp/AsnC family transcriptional regulator, leucine-responsive regulatory protein; Amino Acids and Derivatives / Glutamine, glutamate, aspartate, asparagine; ammonia assimilation / Glutamine,_Glutamate,_Aspartate_and_Asparagine_Biosynthesis / Leucine-responsive regulatory protein, regulator for…	Positive regulator of the bkd operon for branched-chain keto acid dehydrogenase complex; Contains 1 HTH asnC-type DNA-binding domain.
5	POG_2330_01808		G:ENOG410XQE0	K07552	Uncharacterized MFS-type transporter YdeG	Cell membrane; Membrane; Transmembrane; Transmembrane helix; Transport.; Major Facilitator superfamily; MFS transporter, DHA1 family, bicyclomycin/chloramphenicol resistance protein; Clustering-based subsystems / Clustering-based subsystems / CBSS-292415.3.peg.2341 / Major facilitator superfamily (MFS) transporter	Belongs to the major facilitator superfamily.
6	POG_2330_01811		L:COG2963	K07483	Transposase InsN for insertion sequence element IS911A	DNA recombination; DNA-binding; Transposable element; Transposition.; transposase	Involved in the transposition of the insertion sequence IS911. Belongs to the transposase 8 family.
7	POG_2330_01856		S:ENOG410Z8US		hypothetical protein
8	POG_2330_01857		S:ENOG4111XGZ		hypothetical protein	(LipO)protein
9	POG_2330_03514		S:ENOG410YEIK		hypothetical protein
10	POG_2330_03515	iscS, NFS1	E:COG1104	K04487	Cysteine desulfurase	Iron; Iron-sulfur; Metal-binding; Pyridoxal phosphate; Transferase.; cysteine desulfurase; RNA Metabolism / RNA processing and modification / tRNA_modification_Archaea / Cysteine desulfurase (EC 2.8.1.7)	Catalyzes the removal of elemental sulfur from cysteine to produce alanine; Belongs to the class-V pyridoxal-phosphate-dependent aminotransferase family. NifS/IscS subfamily.; KEGG: rsm:CMR15_mp10143 cysteine desulfurase
11	POG_2330_03516	cfa	Q:COG0500	K00574	Cyclopropane-fatty-acyl-phospholipid synthase	Methyltransferase; S-adenosyl-L-methionine; Transferase.; cyclopropane-fatty-acyl-phospholipid synthase; Clustering-based subsystems / null / CBSS-291331.3.peg.3674 / S-adenosyl-L-methionine dependent methyltransferase, similar to cyclopropane-fatty-acyl-phospholipid synthase	Catalyzes the methylation of sarcosine and dimethylglycine to dimethylglycine and betaine, respectively, with S-adenosylmethionine (AdoMet) acting as the methyl donor. It has strict specificity for sarcosine and dimethylglycine as the methyl group acceptors; Belongs to the methyltransferase superfamily.; KEGG: yin:CH53_2491 cyclopropane-fatty-acyl-phospholipid synthase
12	POG_2330_03526	pgl	G:COG2706	K07404	6-phosphogluconolactonase	Carbohydrate metabolism; Glucose metabolism; Hydrolase.; Carbohydrates / Central carbohydrate metabolism / Entner-Doudoroff_Pathway / 6-phosphogluconolactonase (EC 3.1.1.31)	Catalyzes the hydrolysis of 6-phosphogluconolactone to 6-phosphogluconate; Belongs to the cycloisomerase 2 family.; KEGG: ppy:PPE_02033 6-phosphogluconolactonase
13	POG_2330_03527	ACO, acnA	C:COG1048	K01681	Aconitate hydratase	aconitate hydratase; Carbohydrates / Central carbohydrate metabolism / Glyoxylate_bypass / Aconitate hydratase (EC 4.2.1.3)	KEGG: rsl:RPSI07_mp0134 aconitate hydratase
14	POG_2330_03530		C:COG0667	K05275	Pyridoxine 4-dehydrogenase	Aldo keto reductase; pyridoxine 4-dehydrogenase	KEGG: bur:Bcep18194_B2855 pyridoxine 4-dehydrogenase
15	POG_2330_03869		S:COG5525		hypothetical protein	terminase (large subunit); Phages, Prophages, Transposable elements, Plasmids / Phages, Prophages / Phage_packaging_machinery / Phage terminase, large subunit
16	POG_2330_04180	cmtC, dhbA	E:COG0346	K10621	hypothetical protein	glyoxalase bleomycin resistance protein dioxygenase; 2,3-dihydroxy-p-cumate/2,3-dihydroxybenzoate 3,4-dioxygenase; Metabolism of Aromatic Compounds / null / p-cymene_degradation / 2,3-dihydroxy-p-cumate-3,4-dioxygenase (CmtC)	KEGG: apac:S7S_06980 2,3-dihydroxy-p-cumate/2,3-dihydroxybenzoate 3,4-dioxygenase; With incorporation of two atoms of oxygen
17	POG_2330_04181	cmtD, dhbB	Q:COG0235	K10622	hypothetical protein	Class II aldolase adducin; HCOMODA/2-hydroxy-3-carboxy-muconic semialdehyde decarboxylase; Metabolism of Aromatic Compounds / null / p-cymene_degradation / HCOMODA decarboxylase	KEGG: vpd:VAPA_1c22800 HCOMODA/2-hydroxy-3-carboxy-muconic semialdehyde decarboxylase; Carboxy-lyases
18	POG_2330_04182	dmpC, xylG	C:COG1012	K10217	Aminomuconate-semialdehyde dehydrogenase	Cytoplasm; NAD; Oxidoreductase; Ubl conjugation.; Amino Acids and Derivatives / Aromatic amino acids and derivatives / Aromatic_amino_acid_degradation / 5-carboxymethyl-2-hydroxymuconate semialdehyde dehydrogenase (EC 1.2.1.60)	Involved in ferulic acid and sinapic acid biosynthesis by oxidation of conyferylaldehyde and sinapaldehyde, respectively. Can oxidize L-lactaldehyde. Possesses activity on acetaldehyde and glycolaldehyde in vitro; Belongs to the aldehyde dehydrogenase family.; KEGG: rso:RSp0890 aminomuconate-semialdehyde/2-hydroxymuconate-6-semialdehyde dehydrogenase
19	POG_2330_04183	mhpD	Q:COG3971	K02554	2-oxopent-4-enoate hydratase	Aromatic hydrocarbons catabolism; Lyase.; 2-oxopent-4-enoate hydratase activity; 2-keto-4-pentenoate hydratase; Secondary Metabolism / Aromatic amino acids and derivatives / Cinnamic_Acid_Degradation / 2-keto-4-pentenoate hydratase (EC 4.2.1.-)	Catalyzes the conversion of 2-hydroxypentadienoic acid (enolic form of 2-oxopent-4-enoate) to 4-hydroxy-2-ketopentanoic acid; Belongs to the hydratase/decarboxylase family. MhpD subfamily.; KEGG: rsm:CMR15_mp10875 2-keto-4-pentenoate hydratase
20	POG_2330_04184	dmpH, xylI, nahK	Q:COG3971	K01617	2-oxo-3-hexenedioate decarboxylase	Aromatic hydrocarbons catabolism; Lyase; Magnesium; Manganese.; Amino Acids and Derivatives / Aromatic amino acids and derivatives / Tryptophan_catabolism / 4-oxalocrotonate decarboxylase (EC 4.1.1.77)	Involved in the modified meta-cleavage pathway for the 2-aminophenol catabolism; Belongs to the hydratase/decarboxylase family.; KEGG: rsm:CMR15_mp10876 2-oxo-3-hexenedioate decarboxylase
21	POG_2330_04185	praC, xylH	S:COG1942	K01821	2-hydroxymuconate tautomerase	Isomerase; Plasmid.; 4-oxalocrotonate tautomerase; Metabolism of Aromatic Compounds / Metabolism of central aromatic intermediates / Central_meta-cleavage_pathway_of_aromatic_compound_degradation / 4-oxalocrotonate tautomerase (EC 5.3.2.-)	Belongs to the 4-oxalocrotonate tautomerase family.; KEGG: ppse:BN5_3616 4-oxalocrotonate tautomerase
22	POG_2330_04186	mhpF	Q:COG4569	K04073	Acetaldehyde dehydrogenase (acetylating)	Aromatic hydrocarbons catabolism; NAD; Oxidoreductase.; Metabolism of Aromatic Compounds / Metabolism of central aromatic intermediates / Central_meta-cleavage_pathway_of_aromatic_compound_degradation / Acetaldehyde dehydrogenase, acetylating, (EC 1.2.1.10) in gene cluster for degradation of phenols, cresols, catechol	Catalyzes the conversion of acetaldehyde to acetyl-CoA, using NAD(+) and coenzyme A. Is the final enzyme in the meta- cleavage pathway for the degradation of aromatic compounds; Belongs to the acetaldehyde dehydrogenase family.; KEGG: pre:PCA10_33750 acetaldehyde dehydrogenase
23	POG_2330_04187	mhpE	E:COG0119	K01666	4-hydroxy-2-oxovalerate aldolase	Aromatic hydrocarbons catabolism; Lyase; Manganese; Metal-binding; Plasmid.; Catalyzes the condensation of the acetyl group of acetyl-CoA with 3-methyl-2-oxobutanoate (2-oxoisovalerate) to form 3-carboxy-3-hydroxy-4-methylpentanoate (2-isopropylmalate) (By similarity); Metabolism of Aromatic Compounds / null / carbazol_degradation_cluster / 4-hydroxy-2-oxovalerate aldolase (EC 4.1.3.-)	Catalyzes the retro-aldol cleavage of 4-hydroxy-2- oxopentanoate to pyruvate and acetaldehyde. Is involved in the meta-cleavage pathway for the degradation of aromatic compounds; Belongs to the 4-hydroxy-2-oxovalerate aldolase family.; KEGG: rsm:CMR15_mp10879 4-hydroxy 2-oxovalerate aldolase
24	POG_2330_04189		S:ENOG410Z9MC		hypothetical protein	signal peptide protein
25	POG_2330_04190		O:COG0526	K03673	Thiol:disulfide interchange protein DsbA	Disulfide bond; Periplasm; Redox-active center; Signal.; Thioredoxin; thiol:disulfide interchange protein DsbA; Respiration / null / Biogenesis_of_c-type_cytochromes / Periplasmic thiol:disulfide interchange protein DsbA	Involved in disulfide-bond formation. Acts by transferring its disulfide bond to other proteins (By similarity); Belongs to the thioredoxin family. DsbA subfamily; Contains 1 thioredoxin domain.
26	POG_2330_04191	hpaH	Q:COG3971	K02509	hypothetical protein	2-oxopent-4-enoate hydratase activity; 2-oxo-hept-3-ene-1,7-dioate hydratase; Metabolism of Aromatic Compounds / Peripheral pathways for catabolism of aromatic compounds / Biphenyl_Degradation / 2-keto-4-pentenoate hydratase (EC 4.2.1.-)	KEGG: dsh:Dshi_0880 2-oxo-hept-3-ene-1,7-dioate hydratase; Hydro-lyases
27	POG_2330_04214		K:COG1309		hypothetical protein	Transcriptional regulator; Virulence, Disease and Defense / Resistance to antibiotics and toxic compounds / Multidrug_Resistance_Efflux_Pumps / Transcription regulator of multidrug efflux pump operon, TetR (AcrR) family
28	POG_2330_04215		S:ENOG4111GFK		hypothetical protein
29	POG_2330_04702		Q:COG3319	K13611	Mycosubtilin synthase subunit	Antibiotic biosynthesis; Ligase; Multifunctional enzyme; Phosphopantetheine; Phosphoprotein; Pyridoxal phosphate; Repeat; Transferase.; synthetase; polyketide synthase PksJ; Clustering-based subsystems / Putative asociate of RNA polymerase sigma-54 factor rpoN / CBSS-316057.3.peg.1308 / macromolecule metabolism	This protein is a multifunctional enzyme, able to activate a long chain fatty acid and link it with the amino acid Asn as part of the synthesis of mycosubtilin. The activation sites consist of individual domains; Belongs to the ATP-dependent AMP-binding enzyme family; Contains 4 acyl carrier domains.
30	POG_2330_04732				hypothetical protein
31	POG_2330_04740		S:COG1574	K07047	Putative amidohydrolase YtcJ	Hydrolase.; amidohydrolase; uncharacterized protein; RNA Metabolism / RNA processing and modification / tRNA_modification_Archaea / Methylthioadenosine deaminase
32	POG_2330_04748				hypothetical protein
33	POG_2330_04749		C:COG4313		hypothetical protein	Phenol degradation-like protein; Metabolism of Aromatic Compounds / Peripheral pathways for catabolism of aromatic compounds / Phenylpropanoid_compound_degradation / Protein involved in meta-pathway of phenol degradation
34	POG_2330_04750		S:COG3584		hypothetical protein	domain protein
